# Supplementary material for: Exome Analysis Reveals Novel Missense and Deletion Variants in the CC2D2A Gene as Causative of Joubert Syndrome
Source: MDPI journal article supplement (doi:10.3390/genes14040810), 2023-03-28
Supplement: s1 [file s1]

## Supplementary Tables

**Table S1.** Joubert Syndrome gene panel according to Human Phenotype Ontology. \* Coverage of  $\geq 82\%$  and  $\leq 97\%$  with a target read depth 20X.

|        |         |          |           |         |         |          |
|--------|---------|----------|-----------|---------|---------|----------|
| AHI1   | ARL13B  | ARL3     | ARMC9*    | B9D1    | B9D2    | CC2D2A*  |
| CEP104 | CEP120  | CEP290*  | CEP41     | CPLANE1 | CSPP1*  | FAM149B1 |
| HYLS1  | INPP5E  | KIAA0556 | KIAA0586* | KIF7    | MKS1    | NPHP1*   |
| OFD1   | PDE6D   | PIBF1*   | RPGRIP1L  | SUFU    | TCTN1   | TCTN2    |
| TCTN3  | TMEM107 | TMEM138  | TMEM216   | TMEM231 | TMEM237 | TMEM67*  |
| TTC21B | ZNF423  |          |           |         |         |          |

**Table S2.** Primers used in Sanger Sequencing

| Primer name   | Primers (5'-3')         | Amplicon size (bp) |
|---------------|-------------------------|--------------------|
| CC2D2A-ex30-F | GGGATTGGCTTTGAATGCCAG   | 409                |
| CC2D2A-ex30-R | GAAGGCTCTGTTTGTGTAGGAAA |                    |

**Table S3.** Primers used in qPCR experiments

| Primer name   | Primers (5'-3')        | Amplicon size (bp) |
|---------------|------------------------|--------------------|
| CC2D2A-ex29-F | CTGGCTGGGATGTGTGAA     | 87                 |
| CC2D2A-ex29-R | CCTGCTCTCATGGACCTCTAA  |                    |
| CC2D2A-ex30-F | CTGGTTCCTGGAGAGTCCAT   | 93                 |
| CC2D2A-ex30-R | CCTAGCAAGCATTCTTTGTGTT |                    |
| CC2D2A-ex31-F | TCGTCAGTGCCTTACAACAGT  | 87                 |
| CC2D2A-ex31-R | TCCTGAGGAGGGTTTAAAGGT  |                    |
| CC2D2A-ex32-F | AGGAACTGGTGGCTCGATA    | 87                 |
| CC2D2A-ex32-R | ATGTGCTCCAGAGGTCACAGA  |                    |
| GAPDH-F       | CTGCACCACTGCTT         | 87                 |
| GAPDH-R       | CCCAGCTCTCATACCATGAGT  |                    |
